# Supplementary material for: Growth hormone receptor-deficient pigs resemble the pathophysiology of human Laron syndrome and reveal altered activation of signaling cascades in the liver
Source: PubMed Central journal article supplement (PMC6001387; doi:10.1016/j.molmet.2018.03.006), 2018-03-15
Supplement: mmc1.pdf [file mmc1.pdf]

## **Supplementary Material**

### **Growth hormone receptor-deficient pigs resemble the pathophysiology of human Laron syndrome and reveal altered activation of signaling cascades in the liver**

Arne Hinrichs, Barbara Keßler, Mayuko Kurome, Andreas Blutke, Elisabeth Kemter, Maren Bernau, Armin M. Scholz, Birgit Rathkolb, Simone Renner, Sebastian Bultmann, Heinrich Leonhardt, Martin Hrabě de Angelis, Hiroshi Nagashima, Andreas Hoefflich, Werner F. Blum, Martin Bidlingmaier, Rüdiger Wanke, Maik Dahlhoff, Eckhard Wolf

**Supplementary Table 1.** Antibodies employed for Western blot analyses.

| <b>Antigen</b> | <b>Antibody</b>                           | <b>Host</b> | <b>Dilution</b> |
|----------------|-------------------------------------------|-------------|-----------------|
| pJAK2          | Cell Signaling, Frankfurt, Germany #3776  | rabbit      | 1:2000          |
| JAK2           | Cell Signaling, Frankfurt, Germany #3230  | rabbit      | 1:2000          |
| pMAPK          | Cell Signaling, Frankfurt, Germany #4370  | rabbit      | 1:2000          |
| MAPK           | Cell Signaling, Frankfurt, Germany #9102  | rabbit      | 1:2000          |
| pSTAT1         | Cell Signaling, Frankfurt, Germany #7649  | rabbit      | 1:2000          |
| STAT1          | Cell Signaling, Frankfurt, Germany #14994 | rabbit      | 1:2000          |
| pSTAT3         | Cell Signaling, Frankfurt, Germany #9145  | rabbit      | 1:2000          |
| STAT3          | Cell Signaling, Frankfurt, Germany #12640 | rabbit      | 1:2000          |
| pSTAT5         | Cell Signaling, Frankfurt, Germany #9359  | rabbit      | 1:2000          |
| STAT5          | Cell Signaling, Frankfurt, Germany #94205 | rabbit      | 1:2000          |
| pPI3K          | Cell Signaling, Frankfurt, Germany #4228  | rabbit      | 1:2000          |
| PI3K           | Cell Signaling, Frankfurt, Germany #4257  | rabbit      | 1:2000          |
| pAKT           | Cell Signaling, Frankfurt, Germany #4060  | rabbit      | 1:2000          |
| AKT            | Cell Signaling, Frankfurt, Germany #4691  | rabbit      | 1:2000          |
| pmTOR          | Cell Signaling, Frankfurt, Germany #5536  | rabbit      | 1:1000          |
| mTOR           | Cell Signaling, Frankfurt, Germany #2983  | rabbit      | 1:1000          |
| pAMPK          | Cell Signaling, Frankfurt, Germany #2535  | rabbit      | 1:2000          |
| AMPK           | Cell Signaling, Frankfurt, Germany #2532  | rabbit      | 1:2000          |
| pS6K           | Cell Signaling, Frankfurt, Germany #9205  | rabbit      | 1:2000          |
| pS6K           | Cell Signaling, Frankfurt, Germany #2708  | rabbit      | 1:2000          |
| p4EBP1         | Cell Signaling, Frankfurt, Germany #2855  | rabbit      | 1:2000          |
| 4EBP1          | Cell Signaling, Frankfurt, Germany #9644  | rabbit      | 1:2000          |
| eIF4E          | Cell Signaling, Frankfurt, Germany #9742  | rabbit      | 1:2000          |
| PPARG          | Cell Signaling, Frankfurt, Germany #2435  | rabbit      | 1:2000          |
| pGSK3B         | Cell Signaling, Frankfurt, Germany #9322  | rabbit      | 1:2000          |
| GSK3B          | Cell Signaling, Frankfurt, Germany #9315  | rabbit      | 1:2000          |
| pINSR          | Cell Signaling, Frankfurt, Germany #3024  | rabbit      | 1:2000          |
| INSR           | Cell Signaling, Frankfurt, Germany #3025  | rabbit      | 1:2000          |
| pIRS1          | Cell Signaling, Frankfurt, Germany #3203  | rabbit      | 1:2000          |
| IRS1           | Cell Signaling, Frankfurt, Germany #3407  | rabbit      | 1:2000          |
| pLEPR          | Merck, Darmstadt, Germany #07-1317        | rabbit      | 1:500           |
| LEPR           | Bio-Rad, Munich, Germany #AHP1396         | goat        | 1:1000          |

**Supplementary Table 2.** Factors affecting body fat content, muscle-to-back fat ratio, and serum leptin levels of 6-month-old control and *GHR-KO* pigs.

| Parameter                      | Control |      |     | <i>GHR-KO</i> |      |     | Factors (p values) |        |           |
|--------------------------------|---------|------|-----|---------------|------|-----|--------------------|--------|-----------|
|                                | Sex     | mean | SD  | Sex           | mean | SD  | Group              | Sex    | Group*Sex |
| Body fat (%)                   | male    | 9.6  | 1.1 | male          | 20.9 | 2.2 | < 0.0001           | 0.0108 | 0.1543    |
|                                | female  | 13.2 | 2.5 | female        | 22.0 | 4.1 |                    |        |           |
| Muscle-to-back fat ratio (v/v) | male    | 8.6  | 2.3 | male          | 2.9  | 0.5 | < 0.0001           | 0.6289 | 0.4335    |
|                                | female  | 7.7  | 2.3 | female        | 3.1  | 1.3 |                    |        |           |
| Serum leptin (µg/L)            | male    | 3.0  | 1.0 | male          | 4.8  | 2.7 | 0.0066             | 0.013  | 0.7437    |
|                                | female  | 4.7  | 1.2 | female        | 6.1  | 1.6 |                    |        |           |

The table shows means and standard deviations (SD) of means for body fat (%) and muscle to fat ratio calculated for 11 male/14 female control pigs and for 6 male/6 female *GHR-KO* pigs. Means and SD for fasting serum leptin were calculated for 9 male/13 female control and 6 male/6 female *GHR-KO* pigs. Data were analyzed using the General Linear Models Procedure (PROC GLM) as described in section 2.8 of the main manuscript.

**Supplementary Table 3.** Organ weights of control and *GHR*-KO pigs.

|                                            | Control (n = 25)    | <i>GHR</i> -KO (n = 9) | % of Control | p value  |
|--------------------------------------------|---------------------|------------------------|--------------|----------|
| <b>Absolute weights (g)</b>                |                     |                        |              |          |
| Liver                                      | 2315.5 ± 80.4       | 711.5 ± 133.9          | 30.6 ± 1.8   | < 0.0001 |
| Kidneys*                                   | 335.7 ± 11.0        | 102.4 ± 18.4           | 30.7 ± 1.4   | < 0.0001 |
| Heart                                      | 356.6 ± 9.9         | 133.0 ± 16.4           | 37.3 ± 2.1   | < 0.0001 |
| Brain                                      | 99.3 ± 1.5          | 83.4 ± 2.5             | 84.1 ± 2.0   | < 0.0001 |
| Lungs                                      | 686.2 ± 21.6        | 257.6 ± 34.9           | 37.1 ± 2.2   | < 0.0001 |
| Spleen                                     | 491.6 ± 28.9        | 177.6 ± 48.0           | 36.1 ± 4.1   | < 0.0001 |
| Pituitary gland                            | 0.27 ± 0.01         | 0.13 ± 0.01            | 46.2 ± 1.8   | < 0.0001 |
| Adrenal glands*                            | 5.56 ± 0.30         | 2.10 ± 0.50            | 37.0 ± 3.0   | < 0.0001 |
| Thyroid gland                              | 7.45 ± 0.30         | 3.05 ± 0.60            | 40.4 ± 2.6   | < 0.0001 |
| <b>Relative weights (% of body weight)</b> |                     |                        |              |          |
| Liver                                      | 2.53 ± 0.10         | 1.85 ± 0.20            | 72.8 ± 2.8   | 0.0005   |
| Kidneys*                                   | 0.37 ± 0.01         | 0.27 ± 0.02            | 74.1 ± 3.8   | 0.0002   |
| Heart                                      | 0.39 ± 0.01         | 0.34 ± 0.01            | 89.1 ± 2.1   | 0.0119   |
| Brain                                      | 0.11 ± 0.005        | 0.22 ± 0.01            | 200.7 ± 10.0 | < 0.0001 |
| Lungs                                      | 0.75 ± 0.03         | 0.68 ± 0.05            | 89.3 ± 6.7   | 0.2304   |
| Spleen                                     | 0.54 ± 0.03         | 0.46 ± 0.06            | 86.1 ± 9.2   | 0.2525   |
| Pituitary gland                            | 2.90 E-4 ± 0.09 E-4 | 3.30 E-4 ± 0.15 E-4    | 110.2 ± 4.0  | 0.0899   |
| Adrenal glands*                            | 6.10 E-3 ± 0.36 E-3 | 5.50 E-3 ± 0.65 E-3    | 88.7 ± 5.6   | 0.4267   |
| Thyroid gland                              | 8.20 E-3 ± 0.45 E-3 | 8.20 E-3 ± 0.80 E-3    | 98.2 ± 7.7   | 0.9384   |

Data are presented as least squares means (LSM) and standard errors (SE) of LSM estimated for the 2 groups (the statistical model used is described in section 2.8 of the main manuscript). LSMs were compared using Student's *t*-tests. \*Cumulative weight of both organs.

**Supplementary Table 4.** Factors affecting parameters of lipid metabolism of control and *GHR*-KO pigs.

| Parameter             | Age | Sex    | Control |      | <i>GHR</i> -KO |      | Factors (p values) |          |        |           |               |
|-----------------------|-----|--------|---------|------|----------------|------|--------------------|----------|--------|-----------|---------------|
|                       |     |        | mean    | SD   | mean           | SD   | Group              | Sex      | Age    | Group*Age | Group*Sex*Age |
| Triglycerides (mg/dL) | 1   | male   | 40.3    | 16.5 | 20.5           | 6.1  | 0.0113             | 0.2435   | 0.7666 | 0.301     | 0.9918        |
|                       |     | female | 44.3    | 20.5 | 25.8           | 10.9 |                    |          |        |           |               |
|                       | 2   | male   | 34.8    | 14.6 | 26.2           | 8.1  |                    |          |        |           |               |
|                       |     | female | 42.1    | 20.3 | 33.9           | 11.0 |                    |          |        |           |               |
| Cholesterol (mg/dL)   | 1   | male   | 76.6    | 7.9  | 61.6           | 4.6  | 0.0851             | < 0.0001 | 0.0535 | 0.0291    | 0.6255        |
|                       |     | female | 86.9    | 4.7  | 78.4           | 4.8  |                    |          |        |           |               |
|                       | 2   | male   | 60.4    | 11.4 | 60.6           | 7.9  |                    |          |        |           |               |
|                       |     | female | 78.2    | 10.4 | 81.0           | 6.7  |                    |          |        |           |               |
| LDL (mg/dL)           | 1   | male   | 47.1    | 5.8  | 38.3           | 3.9  | 0.0971             | < 0.0001 | 0.1097 | 0.1181    | 0.6526        |
|                       |     | female | 53.2    | 3.1  | 47.4           | 2.9  |                    |          |        |           |               |
|                       | 2   | male   | 36.7    | 8.1  | 36.6           | 5.1  |                    |          |        |           |               |
|                       |     | female | 49.2    | 9.8  | 48.9           | 3.4  |                    |          |        |           |               |
| HDL (mg/dL)           | 1   | male   | 31.2    | 3.0  | 26.6           | 4.6  | 0.7111             | 0.0002   | 0.5071 | 0.0022    | 0.4577        |
|                       |     | female | 36.5    | 3.2  | 31.4           | 4.2  |                    |          |        |           |               |
|                       | 2   | male   | 26.9    | 5.1  | 28.1           | 4.7  |                    |          |        |           |               |
|                       |     | female | 30.3    | 2.2  | 36.9           | 2.9  |                    |          |        |           |               |

The table shows means and standard deviations (SD) of means calculated for 6 male/4 female control pigs and 3 male/3 female *GHR*-KO pigs at Age 1 (12-15 weeks) and for 8 male/6 female control pigs and 5 male/4 female *GHR*-KO pigs at Age 2 (23-27 weeks). Data were analyzed using the General Linear Models Procedure (PROC GLM) as described in section 2.8 of the main manuscript.

**Supplementary Table 5.** Clinical-chemical parameters of 6-month-old control and *GHR*-KO pigs.

| Parameter [unit]    | Control (n = 14) | <i>GHR</i> -KO (n = 9) | p value  | Normal range |
|---------------------|------------------|------------------------|----------|--------------|
| Urea [mmol/L]       | 4.3 ± 0.3        | 7.4 ± 0.5              | < 0.0001 | 3.2 – 8.2    |
| Creatinine [μmol/L] | 126.4 ± 5.0      | 91.2 ± 6.5             | 0.0004   | 40 – 133     |
| Total protein [g/L] | 65.3 ± 2.2       | 63.6 ± 2.9             | 0.6381   | 55 – 85      |
| Albumin [g/L]       | 40.1 ± 1.4       | 39.8 ± 1.8             | 0.8957   | 17.3 – 43.3  |
| Bilirubin [μmol/L]  | 1.8 ± 0.1        | 1.5 ± 0.2              | 0.2351   | < 4.3        |
| GGT [U/L]           | 36.4 ± 1.8       | 32.5 ± 2.4             | 0.2131   | 0 – 40       |
| Sodium [mmol/L]     | 141.5 ± 1.0      | 139.9 ± 1.3            | 0.3330   | 133 – 150    |
| Potassium [mmol/L]  | 5.0 ± 0.2        | 4.2 ± 0.3              | 0.0602   | 4.4 – 6.7    |
| Chloride [mmol/L]   | 101.8 ± 0.9      | 99.6 ± 1.2             | 0.1586   | 95 – 110     |
| Calcium [mmol/L]    | 2.6 ± 0.04       | 2.7 ± 0.05             | 0.1744   | 2.4 – 3.0    |
| Magnesium [mmol/L]  | 1.1 ± 0.04       | 1.1 ± 0.05             | 0.2740   | 0.5 – 1.2    |
| Phosphorus [mmol/L] | 2.4 ± 0.1        | 2.2 ± 0.04             | 0.1063   | 2.1 – 3.3    |
| Iron [μmol/L]       | 17.7 ± 1.2       | 23.6 ± 1.6             | 0.0094   | > 17.9       |

Data are presented as least squares means (LSM) and standard errors (SE) of LSM estimated for the 2 groups. The statistical model used is described in section 2.8 of the main manuscript. LSM were compared using Student's t-test.

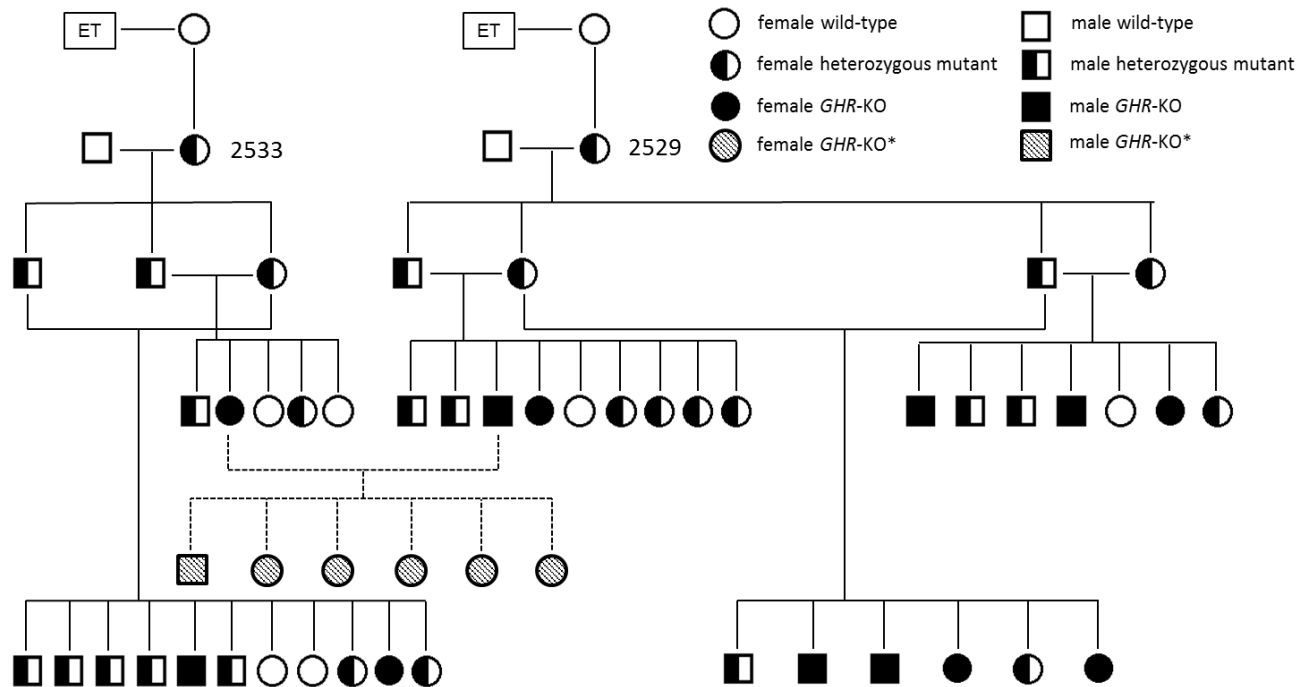

**Supplementary Figure 1.** Breeding scheme of *GHR-KO* animals. Heterozygous founder animals 2533 and 2539 were mated with wild-type boars and their heterozygous offspring were intercrossed to produce *GHR-KO* animals as well as wild-type and heterozygous *GHR* mutant littermates. The mating of two *GHR-KO* animals resulted in a litter of six healthy *GHR-KO\** piglets.

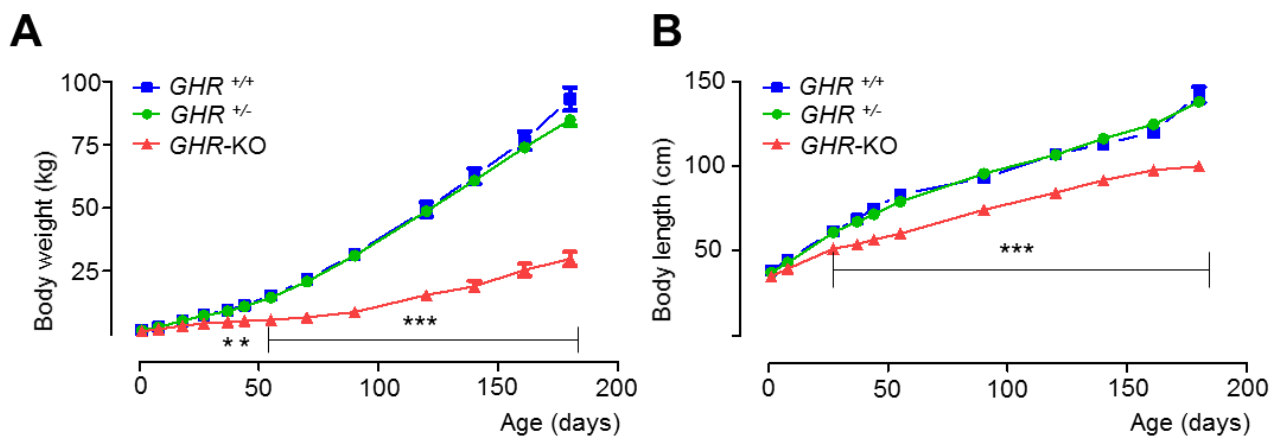

**Supplementary Figure 2.** Body weight gain (A) and longitudinal growth (B) of *GHR-KO* ( $n = 12$ ) compared to wild-type (*GHR*<sup>+/+</sup>;  $n = 6$ ) and heterozygous *GHR* mutant (*GHR*<sup>+/-</sup>;  $n = 19$ ) pigs. Note that there was no significant difference in growth of *GHR*<sup>+/+</sup> and *GHR*<sup>+/-</sup> pigs. The two groups were thus pooled as *GHR* expressing control group.

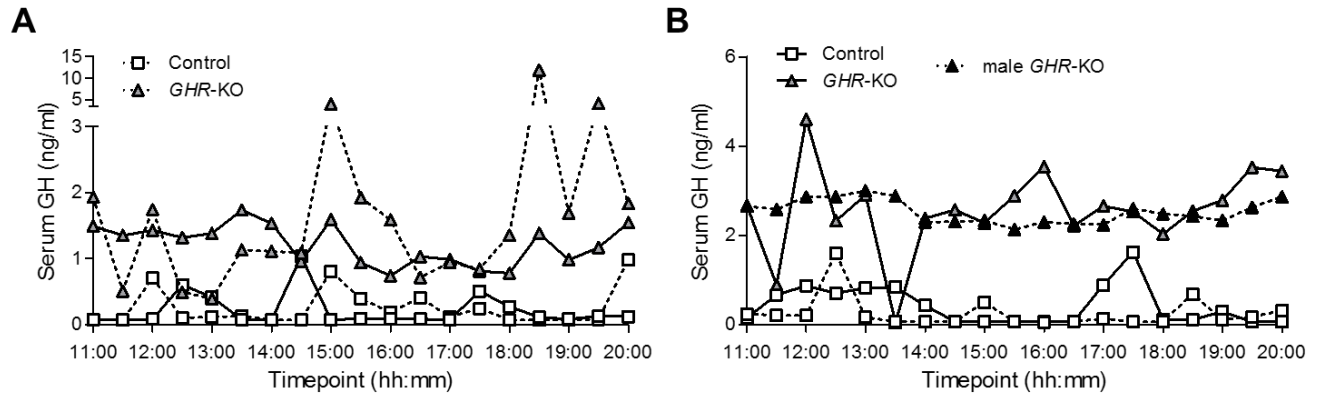

**Supplementary Figure 3.** GH secretion profiles of additional *GHR-KO* (n=4) and control pigs (n=4). (A) Secretion pattern of two female *GHR-KO* and control pigs. (B) Secretion pattern of a female and male *GHR-KO* and two female control pigs.

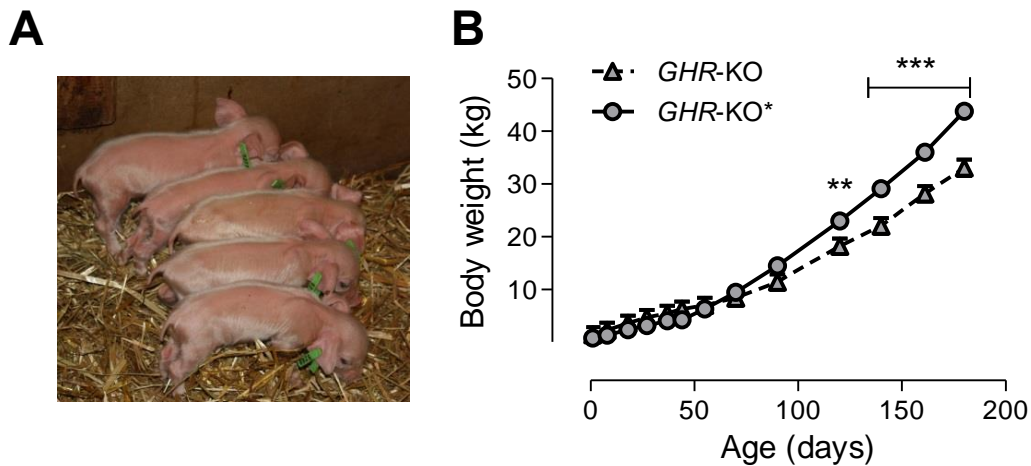

**Supplementary Figure 4.** *GHR-KO* animals are able to reproduce. Mating of a *GHR-KO* sow and *GHR-KO* boar resulted in a litter of healthy *GHR-KO\** piglets. (A) Picture of *GHR-KO\** piglets at the age of one day. (B) *GHR-KO\** piglets had lower birth weights than *GHR-KO* piglets from heterozygote x heterozygote mating, but reached a higher weight at 6 months of age (*GHR-KO*: n = 12, *GHR-KO\**: n = 6). Data are presented as least squares means (LSM) and standard errors (SE) of LSM estimated for the 2 groups. The statistical model used is described in section 2.8 of the main manuscript. LSMs were compared using Student's t-test.



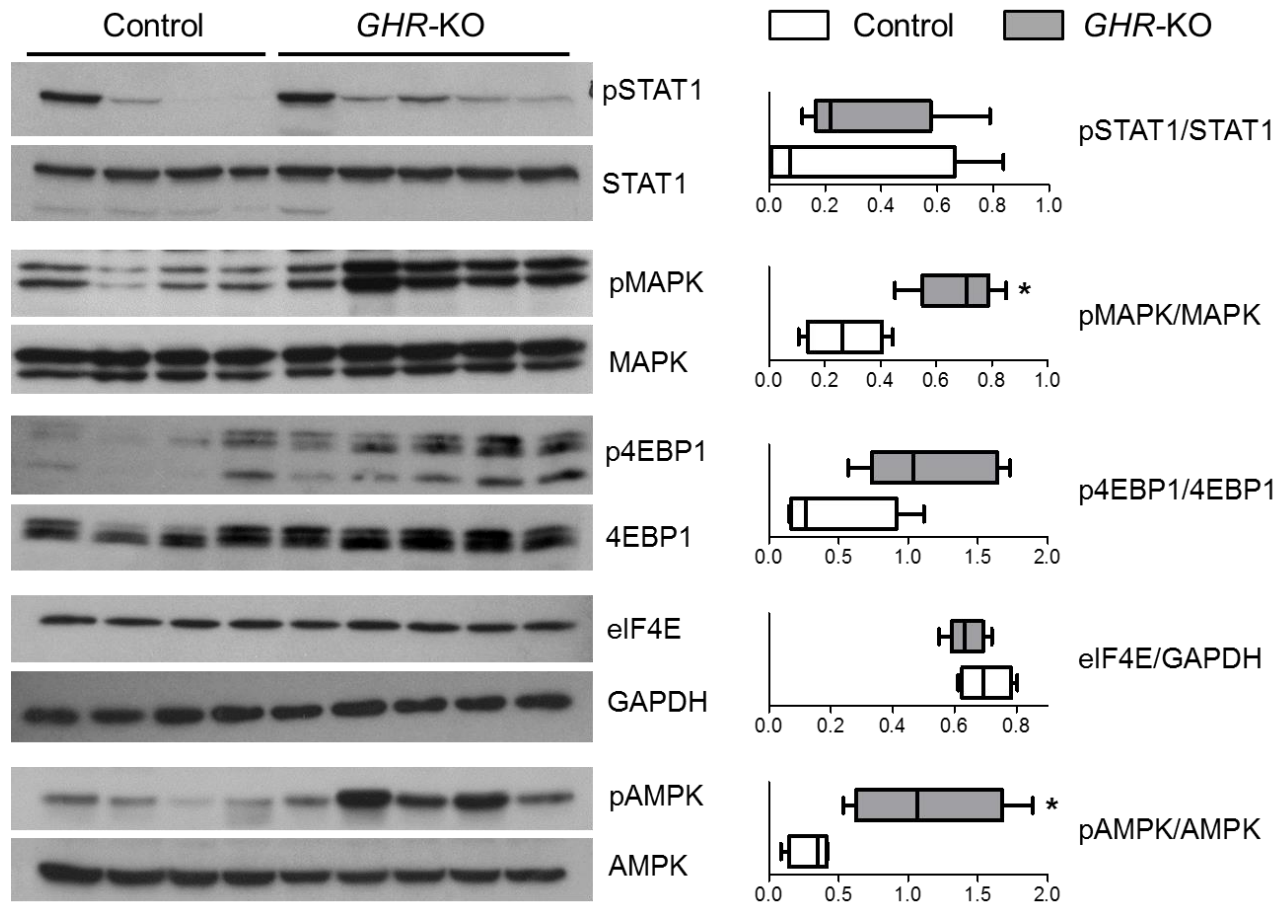

**Supplementary Figure 5.** Western blot analysis of GHR-related signaling molecules in liver samples of 6-month-old fasted *GHR-KO* (n=5) and control pigs (n=4). The box plots show medians, 25<sup>th</sup> and 75<sup>th</sup> percentiles (box), and extremes (whiskers). \* p < 0.05; evaluated using Mann-Whitney U test.
